# Supplementary material
Source: PubMed Central journal article supplement (PMC7986235)
Supplement: FSB2-35-0-s002.pdf [file FSB2-35-0-s002.pdf]

**S1****FSS + SB-431542 vs. SB-431542**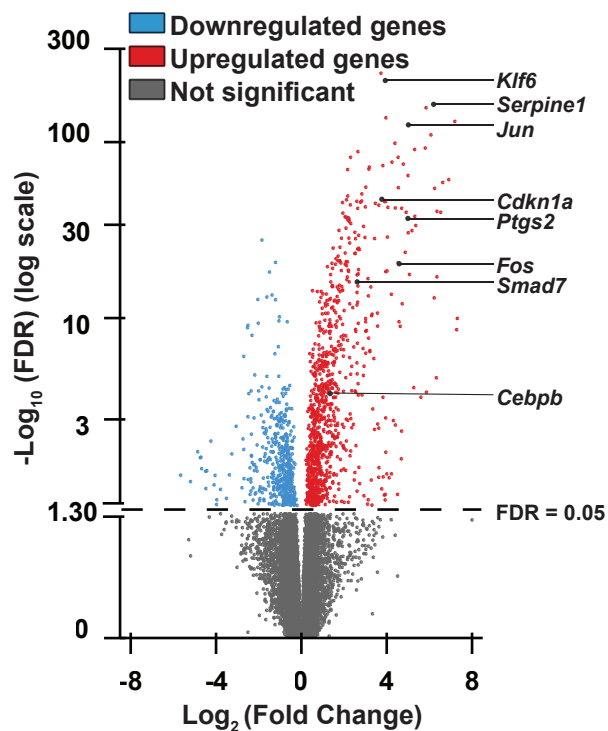

**Supplemental Figure S1: Volcano plot from FSS + SB-431542 vs. SB-431542.** Volcano plot showing the distribution of differential gene expression in FSS-stimulated and unstimulated cells pretreated with the ALK4/5/7 inhibitor SB-431542, and identifying induced (red) and repressed (blue) differentially expressed genes (DEGs).
