# Supplementary material
Source: PubMed Central journal article supplement (PMC7986235)
Supplement: FSB2-35-0-s003.pdf [file FSB2-35-0-s003.pdf]

A FSS vs. Control

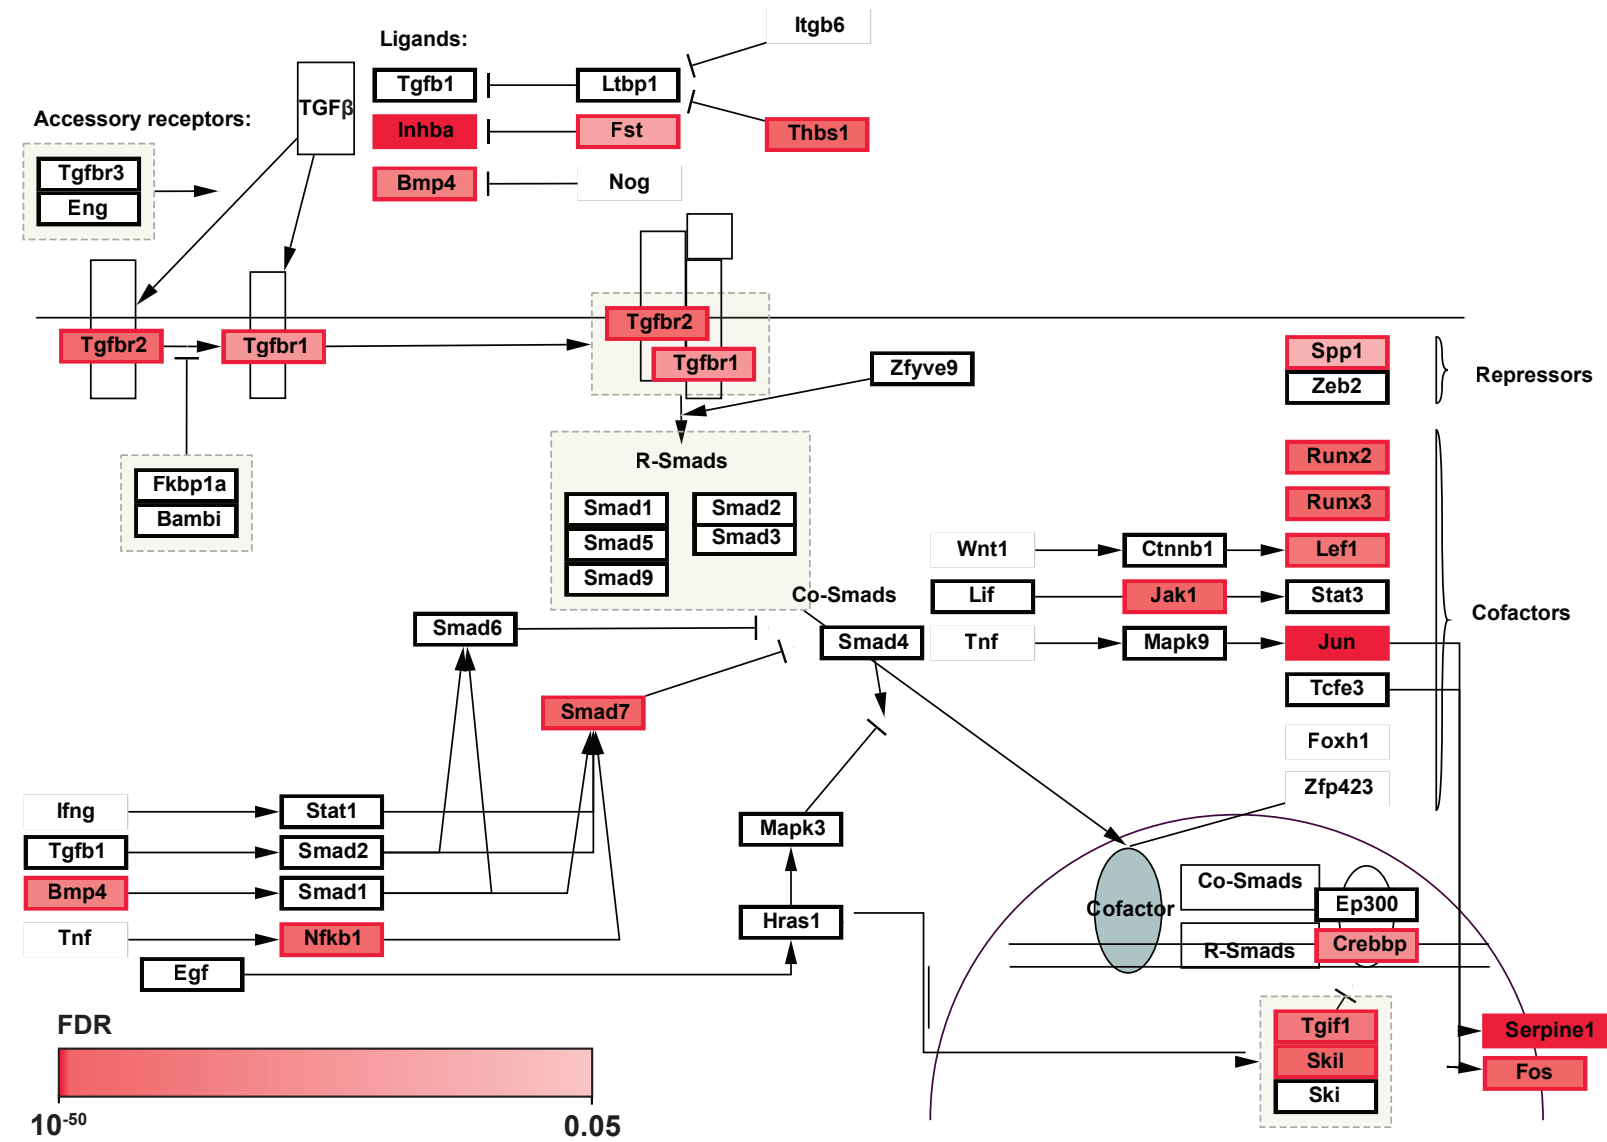

## B FSS + SB-431542 vs. SB-431542

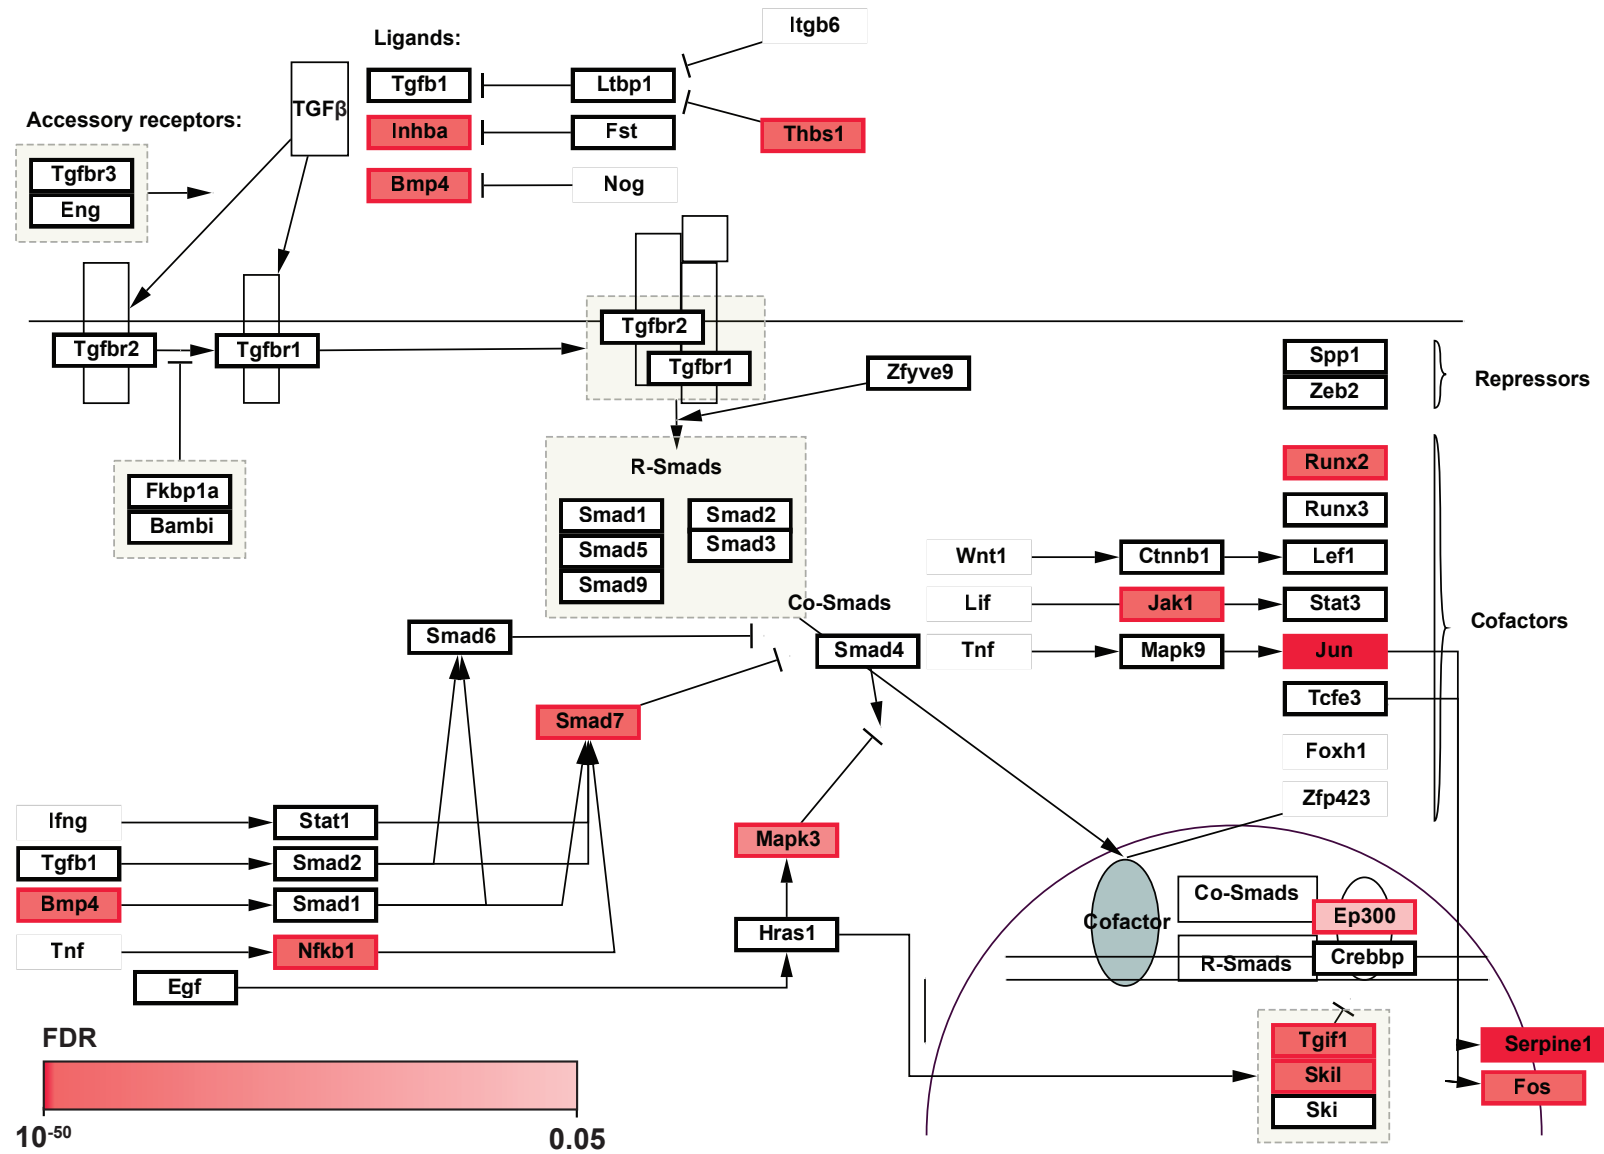

**Supplemental Figure S2: Cytoscape visualization of FSS-regulated TGF $\beta$  pathway differentially expressed genes (DEGs).** Cytoscape (v3.8.0) [66] along with the WikiPathways app for Cytoscape [67] was used to visualize FSS regulated TGF $\beta$  signaling pathway DEGs (FDR<0.05), both in the absence (A) or presence (B) of the ALK4/5/7 inhibitor SB-431542. DESeq2 results (FDR values) were imported into the WikiPathways app for Cytoscape, and DEGs from the TGF $\beta$  signaling pathway have a red border and are color-coded according to their FDR values. Non-DE genes have a thick black border.
